# Supplementary material for: Classifying youth with bipolar disorder versus healthy youth using cerebral blood flow patterns
Source: PubMed Central journal article supplement — J Psychiatry Neurosci. 2023 Aug 29;48(4):E305–14. doi: 10.1503/jpn.230012 (PMC10473037; doi:10.1503/jpn.230012), 2023-08-29
Supplement: JPN-230012-at-1.pdf [file JPN-230012-at-1.pdf]

**Appendix 1** to Luciw NJ, Grigorian A, Dimick MK, et al. Classifying youth with bipolar disorder versus healthy youth using cerebral blood flow patterns. *J Psychiatry Neurosci* 2023. Copyright © 2023 The Author(s) or their employer(s).

To receive this resource in an accessible format, please contact us at [cmaigroup@cmaj.ca](mailto:cmaigroup@cmaj.ca).

DOI: 10.1503/jpn230012

*Online appendices are unedited and posted as supplied by the authors.*

**Supplementary Table 1. Association between the grey matter cerebral blood flow, current mania score, and current depression score; adjusted by age and sex within bipolar disorder group and healthy control group. Beta-weights for each variable within the linear model are shown and significant associations are marked by a bolded \* sign.** GMCBF: Grey matter cerebral blood flow. CDS: Current depression score. CMS: Current mania score. BD: Bipolar disorder.

$$GMCBF = Age + Sex + CDS + CMS$$

|                                | <b>BD (n=46)</b> | <b>Control (n=49)</b> |
|--------------------------------|------------------|-----------------------|
| <b><math>\beta</math>(Age)</b> | -2.34            | -1.55                 |
| <b><math>\beta</math>(Sex)</b> | 6.80             | <b>6.38 *</b>         |
| <b><math>\beta</math>(CDS)</b> | <b>-0.35 *</b>   | -0.12                 |
| <b><math>\beta</math>(CMS)</b> | 0.07             | 6.36                  |
|                                | $R^2 = 0.195$    | $R^2 = 0.177$         |

**Appendix 1** to Luciw NJ, Grigorian A, Dimick MK, et al. Classifying youth with bipolar disorder versus healthy youth using cerebral blood flow patterns. *J Psychiatry Neurosci* 2023. Copyright © 2023 The Author(s) or their employer(s).

To receive this resource in an accessible format, please contact us at [cmaigroup@cmai.ca](mailto:cmaigroup@cmai.ca).

DOI: 10.1503/jpn230012

*Online appendices are unedited and posted as supplied by the authors.*

**Supplementary Table 2. Performance of logistic regression classification of diagnostic group using multivariate fALFF features.** AUC=area under the receiver operating characteristic curve.

| <b>AUC</b>  | <b>Accuracy</b> |
|-------------|-----------------|
| 0.56 ± 0.15 | 0.56 ± 0.12     |
